# Supplementary material for: Glby, Encoded by MAB_3167c, Is Required for In Vivo Growth of Mycobacteroides abscessus and Exhibits Mild β-Lactamase Activity
Source: PubMed Central journal article supplement (PMC9112878; doi:10.1128/jb.00046-22), 2022-04-05
Supplement: jb.00046-22-s0001.pdf [file jb.00046-22-s0001.pdf]

**SUPPLEMENTARY INFORMATION**

**SUPPLEMENTARY TABLES**

**Table S1. Frequency of missense mutations in genes in the *glby* (*MAB\_3167c*) locus**

| <b>Gene ID</b>   | <b># of missense mutation above 5% frequency</b> | <b>Gene Length (kbp)</b> | <b>Mutations/gene length</b> |
|------------------|--------------------------------------------------|--------------------------|------------------------------|
| MAB_3157c        | 12                                               | 1.869                    | 6.421                        |
| MAB_3158c        | 2                                                | 0.447                    | 4.474                        |
| MAB_3159c        | 3                                                | 1.431                    | 2.096                        |
| MAB_3160         | 5                                                | 0.984                    | 5.081                        |
| MAB_3161c        | 1                                                | 0.627                    | 1.595                        |
| MAB_3162c        | 5                                                | 0.63                     | 7.937                        |
| MAB_3163c        | 11                                               | 1.524                    | 7.218                        |
| MAB_3164c        | 2                                                | 0.804                    | 2.488                        |
| MAB_3165c        | 1                                                | 0.747                    | 1.339                        |
| MAB_3166         | 7                                                | 0.375                    | 18.667                       |
| <b>MAB_3167c</b> | <b>1</b>                                         | <b>1.818</b>             | <b>0.550</b>                 |
| MAB_3168c        | 6                                                | 0.813                    | 7.380                        |
| MAB_3169c        | 4                                                | 1.188                    | 3.367                        |
| MAB_3170c        | 6                                                | 1.248                    | 4.808                        |
| MAB_3171c        | 4                                                | 1.17                     | 3.419                        |
| MAB_3172c        | 15                                               | 0.753                    | 19.920                       |
| MAB_3173c        | 7                                                | 0.471                    | 14.862                       |
| MAB_3174         | 4                                                | 0.339                    | 11.799                       |
| MAB_3175c        | 3                                                | 1.122                    | 2.674                        |
| MAB_3176c        | 1                                                | 0.597                    | 1.675                        |
| MAB_3177         | 15                                               | 0.939                    | 15.974                       |

**Table S2. Cell length statistics and t-test vs WT**

|                                   | <b><math>\Delta</math>glby</b> | <b>WT</b>     | <b>COMP</b>   |
|-----------------------------------|--------------------------------|---------------|---------------|
| <b>Mean (<math>\mu</math>m)</b>   | 1.771                          | 1.433         | 1.382         |
| <b>Std Dev</b>                    | 0.5240                         | 0.3898        | 0.2952        |
| <b>Observations</b>               | 251                            | 251           | 250           |
| <b>p-value (vs WT)</b>            | <0.0001                        | -             | >0.10         |
| <b>95% CI (<math>\mu</math>m)</b> | 1.714 - 1.793                  | 1.385 - 1.481 | 1.346 - 1.419 |

**Table S3. Cell melding statistics.**

|                                                   | <b>WT</b> | <b><i>Δglby</i></b> | <b>COMP</b> |
|---------------------------------------------------|-----------|---------------------|-------------|
| <b>*Frequency of observed melding events</b>      | 4.1%      | 21.4%               | 3.5%        |
| <b>**Range of observed cells in melding clump</b> | 2         | 2 - 11              | 2           |
| <b>Total # of cells counted (n)</b>               | 314       | 611                 | 578         |

\*‘Melding event’ is defined as a clear and visible melding between two cells. \*\*‘Range of cells in melding clump’ refers to the number of cells that are clearly melded together in a single clump, such as is shown in Figure 4, where there are more than two cells melded together for *Δglby*.

**Table S4. p-values for CFU lung burdens in each group at each time-point**

| <b>Timepoint</b> | <b>p-value (WT vs <i>Δglby</i>)</b> | <b>p-value (WT vs<br/>COMP)</b> |
|------------------|-------------------------------------|---------------------------------|
| <b>D0</b>        | 0.0005*                             | 0.0128                          |
| <b>W1</b>        | 0.354                               | 0.6654                          |
| <b>W2</b>        | <0.0001*                            | 0.001*                          |
| <b>W3</b>        | <0.0001*                            | 0.378                           |
| <b>W4</b>        | <0.0001*                            | 0.142                           |

Asterisk (\*) denotes a p-value of less than 0.01.

## SUPPLEMENTARY FIGURES

ATGTTTCAGACGTGGATGGGTCCTGGCGATGGTCGGCACCGTGCTGCTGGTGGCCGGTGCTGTCGCGTGTACCC  
CGCGCCCCGATGGGCGGGTCCGGTGGCGGAGAAGTTTTTCGAGGCACTGGCCAAGGGCGATACTGCCGCGG  
CCGCTAAGCTAACCGACGACCCCGATGGCGGAAAGTGGGCCTGGACCAAGCGTTCTCGGGACTACAGGCGAC  
GTCGTTCAAGGCCGCGGTGAATGGCTCGCAGTACACCCAGGACACCGGTAGTGCGGATGCGACCTATACCTGG  
CAGCTGCCAGAAAGCGTGTCTGGACGTATAACGGGCGTCTGGAGATGTTGCGTACGGCAGGTAGCTGGCAG  
GTACGTTGGGCTCCGAGTGACCTGCATCCCAAACCTGGTGAGCGCAAATGCTCTCACTGCGCACAGACCCCGC  
TAAGCGGGCGACGGTCAACGAAGCGGGCGGTACGACGGTGTGGCCCCGGCCAATCTGTACAGAATCGCCTTC  
GATGCCTCGAAGGCCGCAAATCGTTGATGAGCACCGCCACCGCACTTGCCGACGCCATTGGGCCCTACGACG  
ACACCATGAACGCCGCATCCCTGGCAGAGCAGGCGAGTGCGCAAACCTCGCCGATGGACCTGATCACGCTGCG  
TAAGGATGACTGGGACAAGGTATCCATCGCGCTGGAGACGCGGGCCGGGGCGCTGCGGCCCGGCGTGGTGT  
GACGCCATCGCCGATCTGTTGCCACGGACGACGCTTTCGCGCCGGATATTGTCGCCAGGTCAAAAAGGCG  
GTGCTCGACGAGCTGGATGGCGAGGCCGGTGGCGCGTGGTGAGCGTCAACCAGAACGGTGTGACACTGCG  
GTGCTCAACGAGGTGAAACCCACTCCGGCGCCGTGGAAGACGATCAGCCTTGATCGCGCCGTGCAGAACGCCG  
CGCAGAATGCCGTCAATACCCGTGGCCAGAAGGCCATGATGGTAGTCATCAAACCGTCGACGGGTGAGATCCT  
CGCGGTGCGCCAGAACGCCGCCCAACGCTGATGGACCGTGGCCACCACCGGGTTGTATCCGCCTGGGTGCG  
ACATTCAGATCATCACCGCCGGTGCCGCGCTGGAGCGCGGCATGGCCACTCCGGACACCATGGTGGGCTGCC  
CGAAGCGGATACCATCGGTGATCGCAGCGTGCCCACTACAACGAGTTCGATCTCGGCACGGTGCCCATGTG  
GCGGGCATTGCGAACTCGTGAACACCACCTTCGCGAAGCTGGCCAGCGAGATGCCTCTGGACGGTTTGACC  
GTCGCCGCTTACAATTCGGTATCGGACCCGACTACGACGTCGCGGGTATCCCGACCATTCGGGCAACGTACC  
ACCGACCGTCAATCTCACCGAGCGCACCGAGGACGGATTTCGGTCAGGGCAAGGTGCTGGTCACGCCGTTCCGGC  
ATGGCGCTGGCAGCGGCCACCGTGGCAAATGGTAAAACACCTGTACCGCAGCTGATTTCCGGGTCAGATCACCG  
GAATAACCGGTGAGCGGCCCGCGGTGACCCCGACCATGGTCGATGGCCTGCGCGGAATGATGCGCGAGACGG  
TGCTCAGCGGCACCGCCATGGATCTCAAGGGTGAGGGTGCGGTCTTCGGAAAAACGGGCGAAGCGGAGTTTC  
CGGGCGGATCACATGCCTGGTTCGCCGGATACCGCGGCGACATGGCCTTCGCCACCTTGATCGTGGGGGCGG  
CGGTTCCGGAGCCGCGGTGCGCGCCACCAAGGTGATGTTCCAGTCGCTGCCGCCGACTACTTGGCCTGA

**Figure S1. Consensus sequence of *glby* (MAB\_3167c).** This consensus sequence of *glby* was generated using *glby* sequences in 1,046 independent clinical isolates from PATRIC database. Using Geneious® 1,046 sequences of *glby* were aligned and the most common base at each location was identified to generate the consensus sequence.

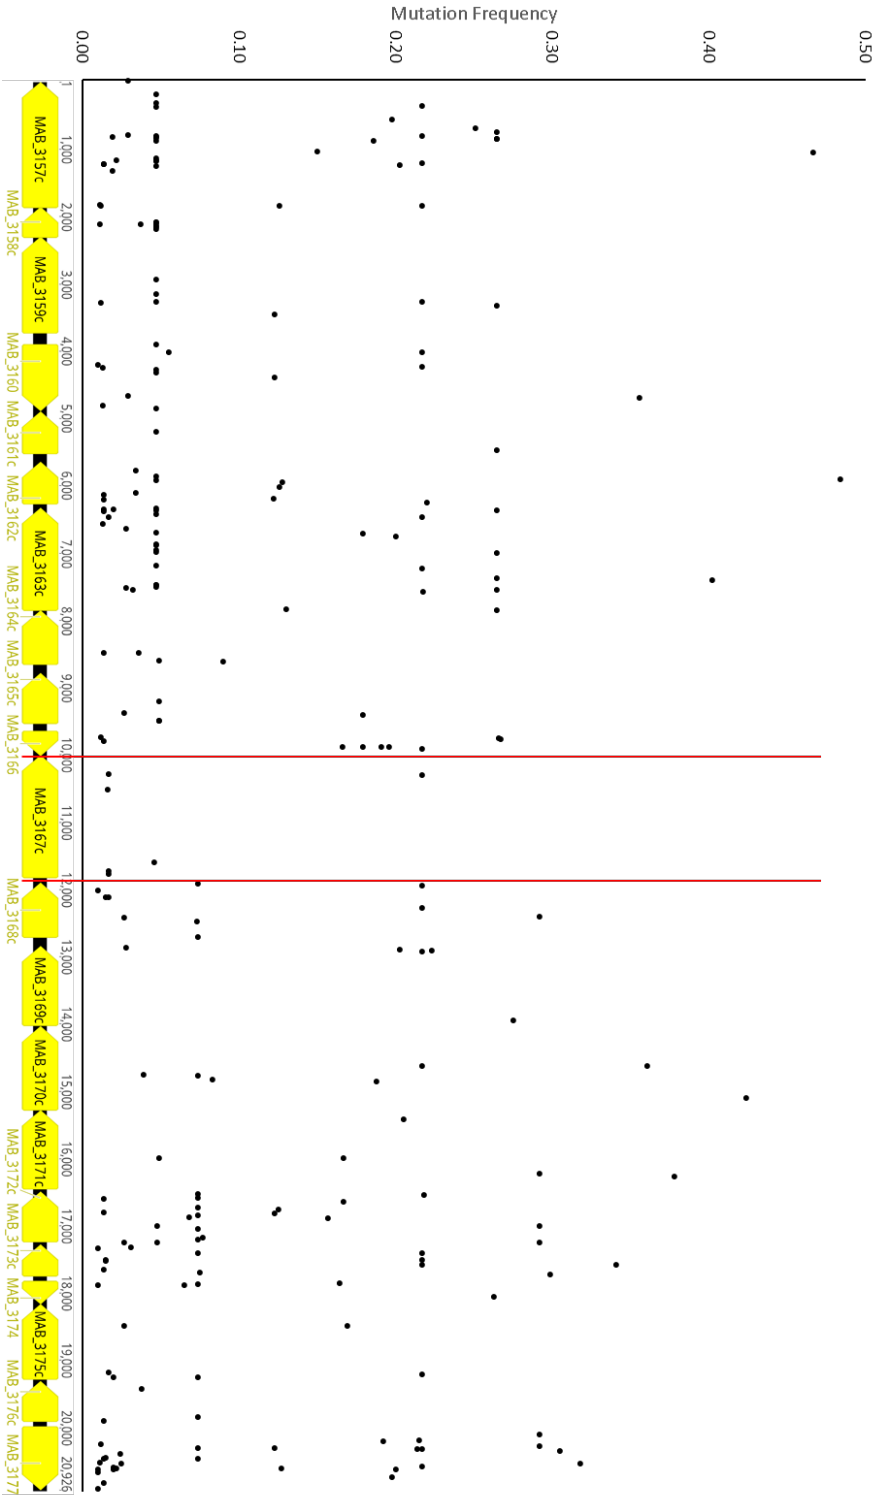

**Figure S2. Frequency of mutations at the locus between genes *MAB\_3166* and *MAB\_3177*.** Black dots represent substitutions in the amino acid sequence of each gene listed on the x-axis in yellow. Red lines highlight the genomic 5' and 3' ends corresponding to *MAB\_3167c* (glby) for comparison to all other genes in this region.

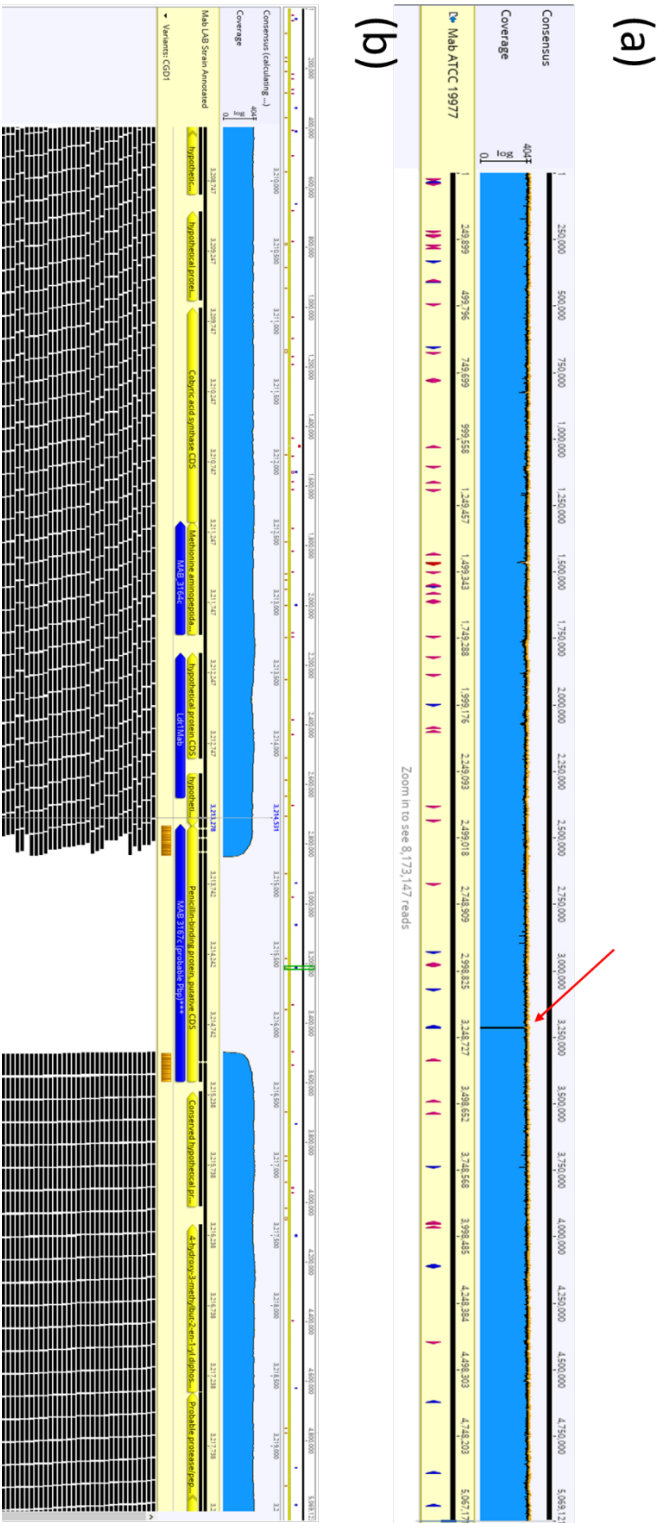

**Figure S3. Mapping and alignment of whole-genome sequencing reads of *ΔglbY* to the genome of *M. abscessus* reference strain ATCC 19977 (wild-type).** (a) Coverage of ~8 million Illumina WGS reads on *M. abscessus* ATCC 19977 genome. Regions shaded blue indicate coverage of reads. (b) Close-up of region indicated by arrow in panel A.

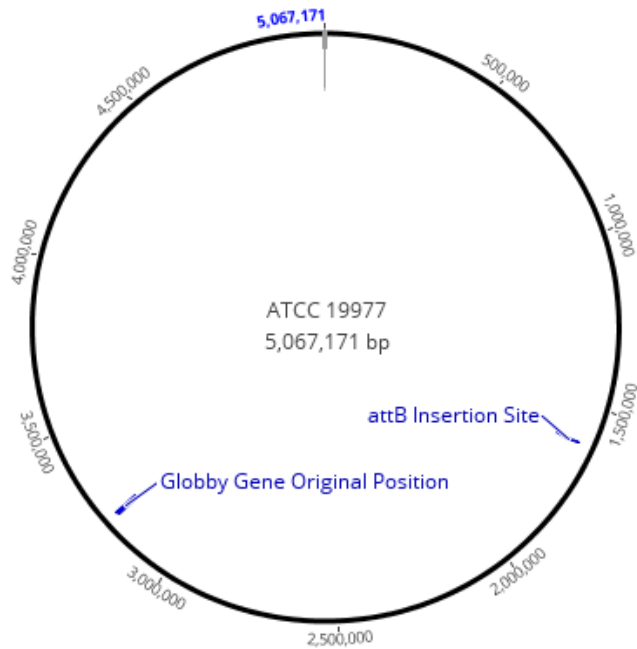

**Figure S4. Genomic Insertion Site for pMH94 based plasmids.** Map of *Mab* ATCC 19977 genome showing *glby*'s original locus within the genome and location of the *attB* insertion site where *glby* was inserted back into  $\Delta glby$  to generate the COMP strain.

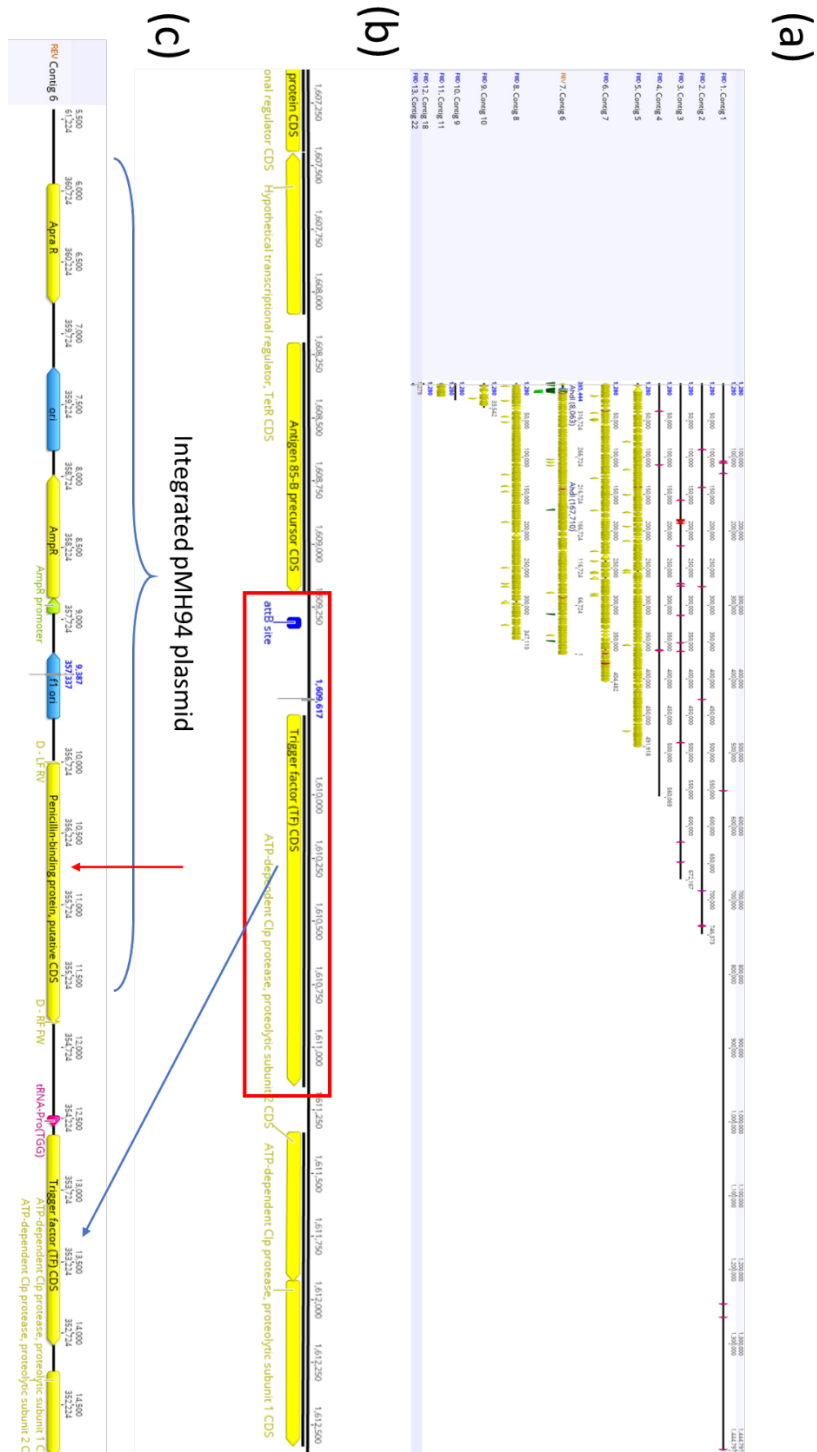

**Figure S5. De novo assembly of COMP strain.** (a) *de novo* assembly results of COMP strain which has been fully annotated based on 100% identity to original genes in *Mab* ATCC 19977. (b) Close-up of *attB* insertion site in *Mab* ATCC 19977. Red box indicates location where pMH94 based plasmid is expected to insert and Trigger Factor (TF) CDS is used as reference. (c) Location where pMH94Apra-MAB\_3167c plasmid integrated into the genome. Blue arrow indicates reference gene for localization. Red arrow indicates *glbY* is found at the *attB* insertion site.

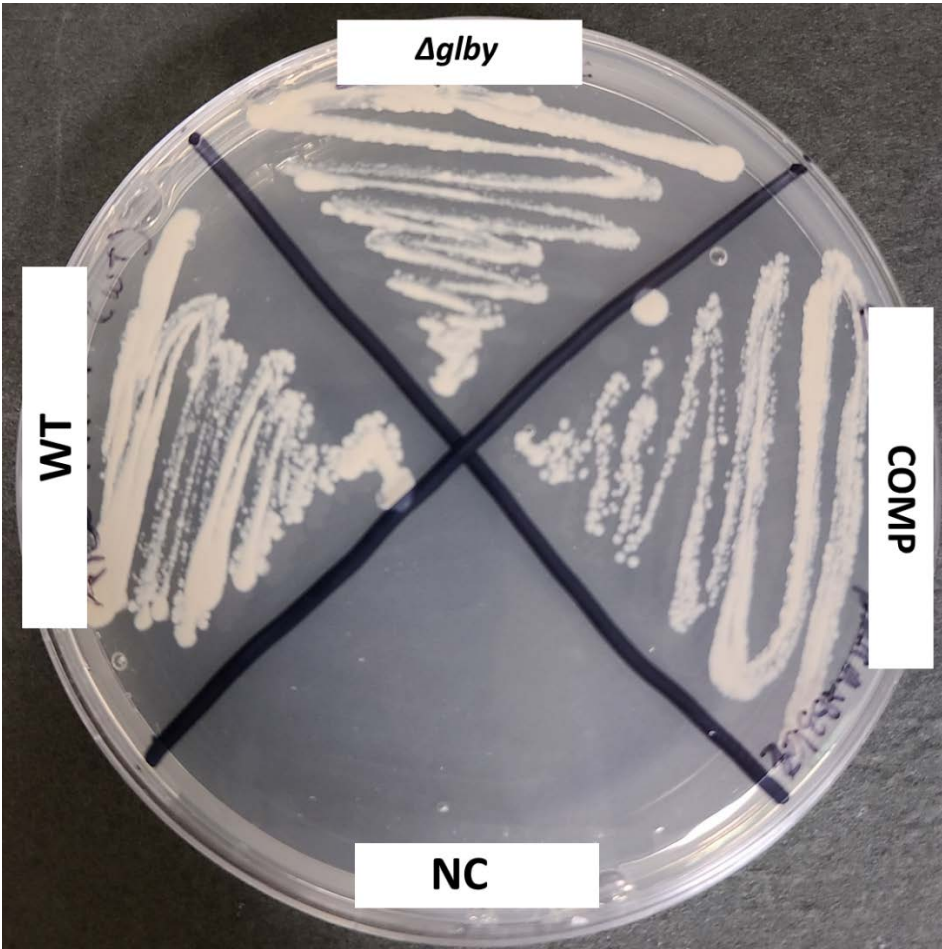

**Figure S6. Colony morphology on 7H10 agar plates.** Parent *Mab* strain ATCC 19977,  $\Delta glby$  and complemented strain (COMP). Region of agar that was not inoculated is designated as negative control (NC).



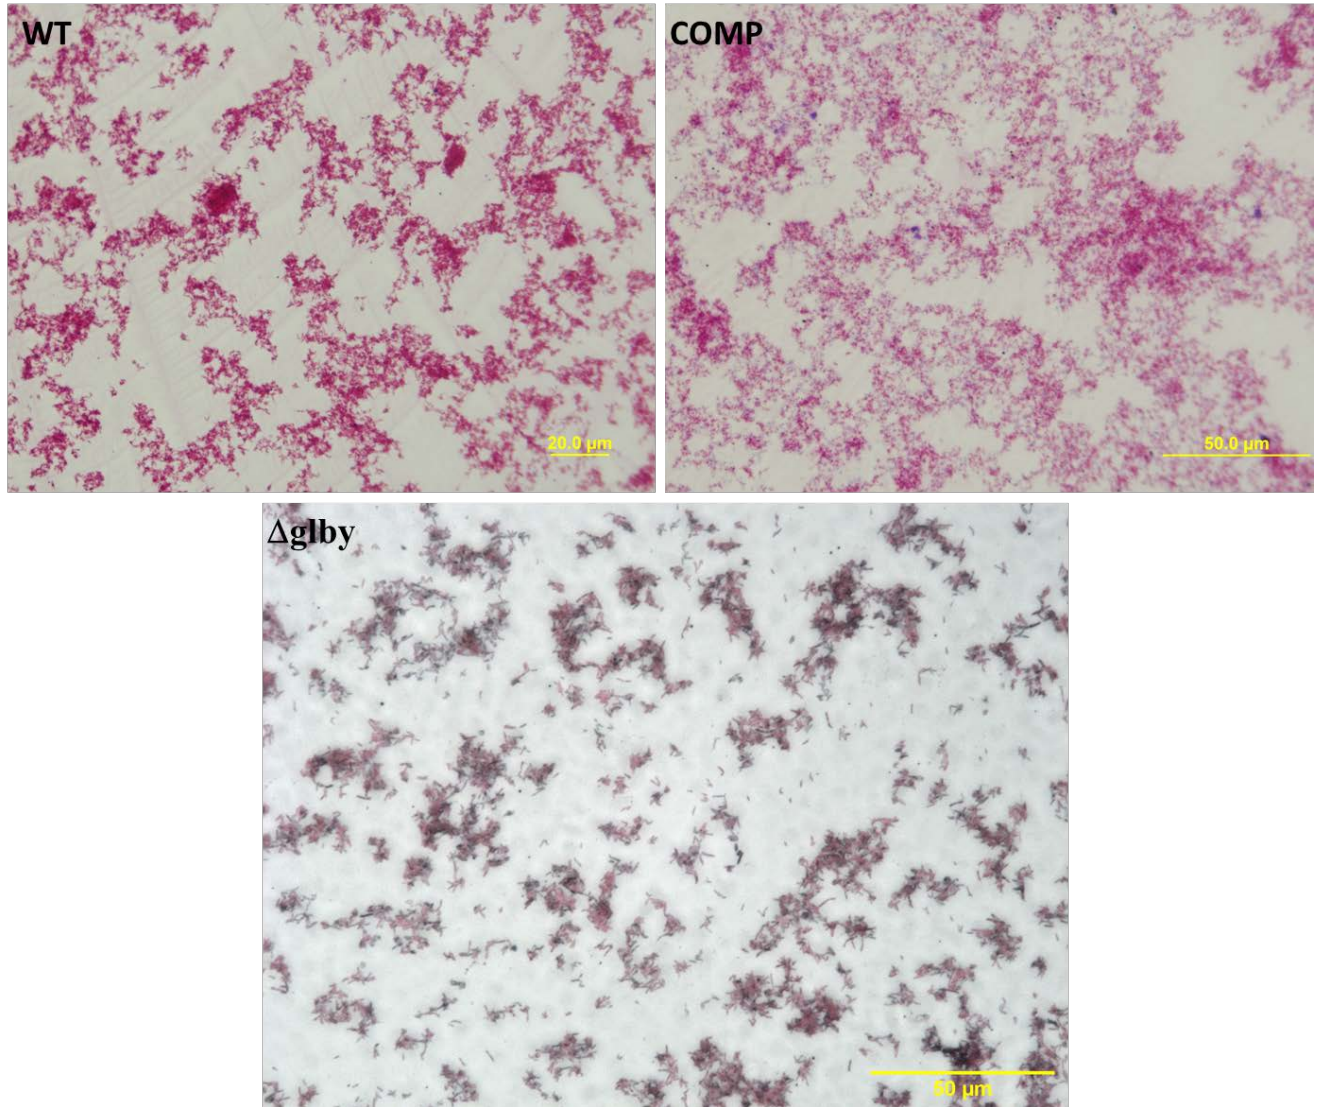

**Figure S7. Ziehl-Neelsen stain of each strain at exponential phase.** Each image was taken at 400x magnification. Parent strain *Mab* ATCC 19977 (WT),  $\Delta glby$  and Complemented strain (COMP).

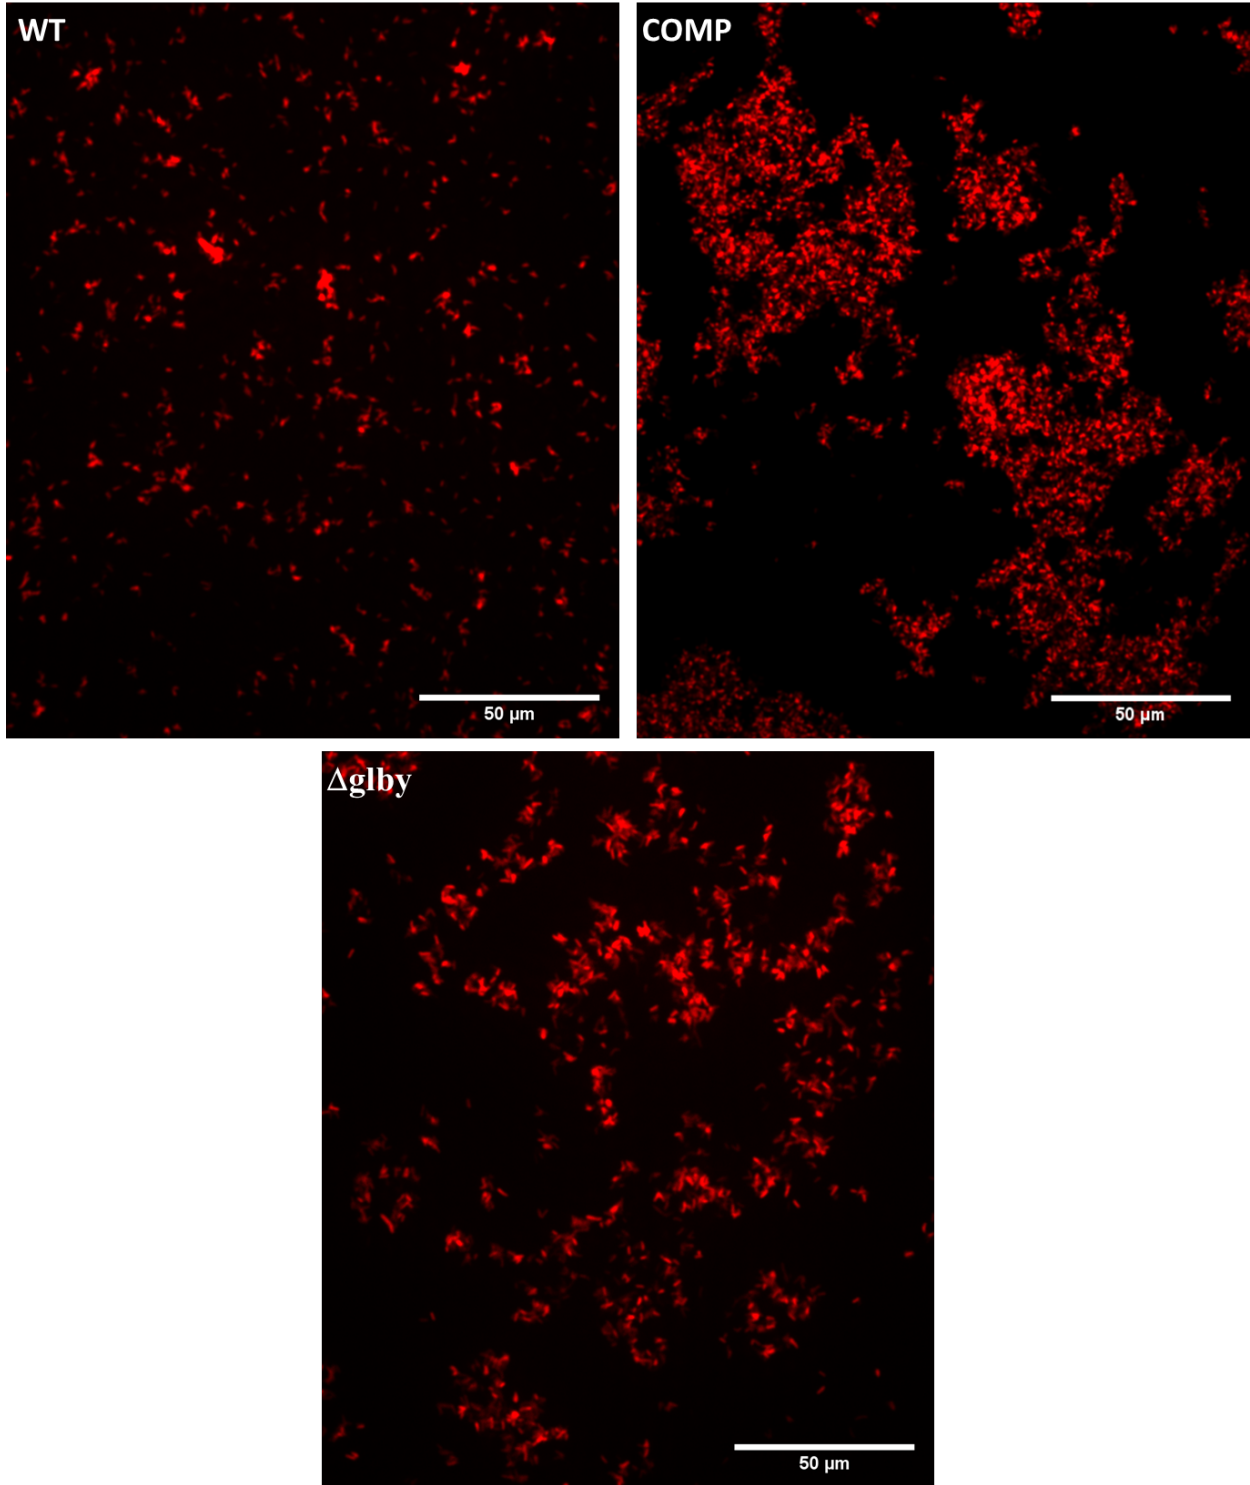

**Figure S8. Auramine-Rhodamine stain of each strain at exponential phase.** Each image was taken at 400x magnification. Parent strain *Mab* ATCC 19977 (WT),  $\Delta glby$  and Complemented strain (COMP).

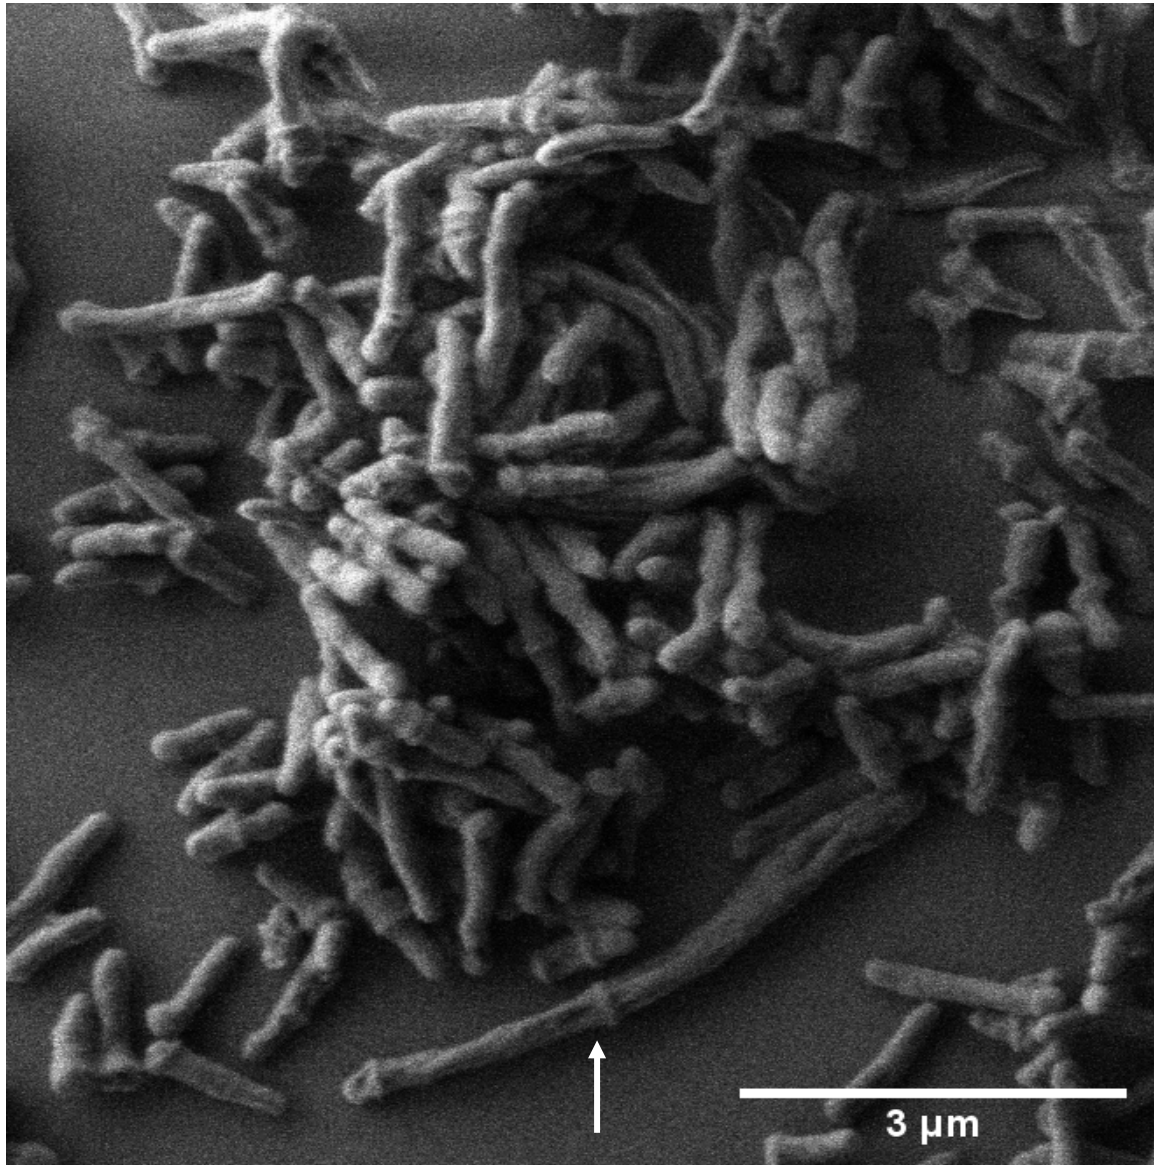

**Figure S9. Scanning Electron Microscopy Image of  $\Delta glby$  cells in exponential phase. Arrow indicates the cell of 5.3 $\mu$ m in length.**

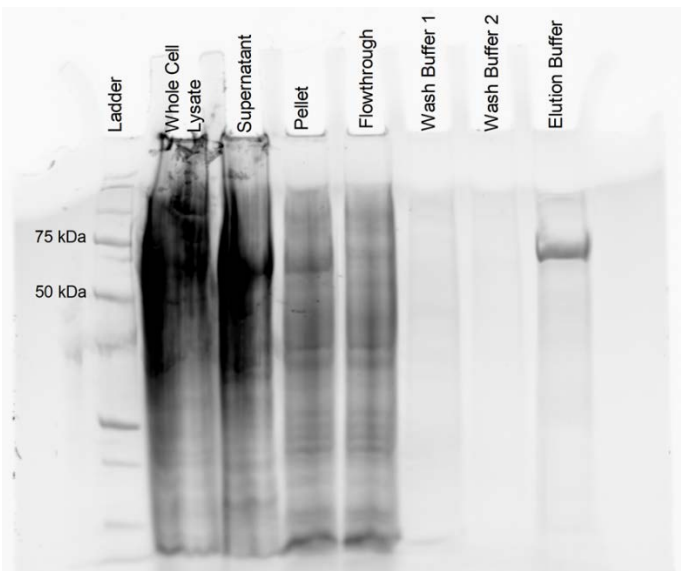

**Figure S10. Various fractions during purification of Glby:** Image of an SDS-PAGE of various fractions collected during the purification of Glby, expressed in *E. coli* DE3BL21 cells using pET28a+Glby, in a stain free gel. Equal volumes of each fraction were loaded in each lane to assess purity of Glby in the fraction in elution buffer.

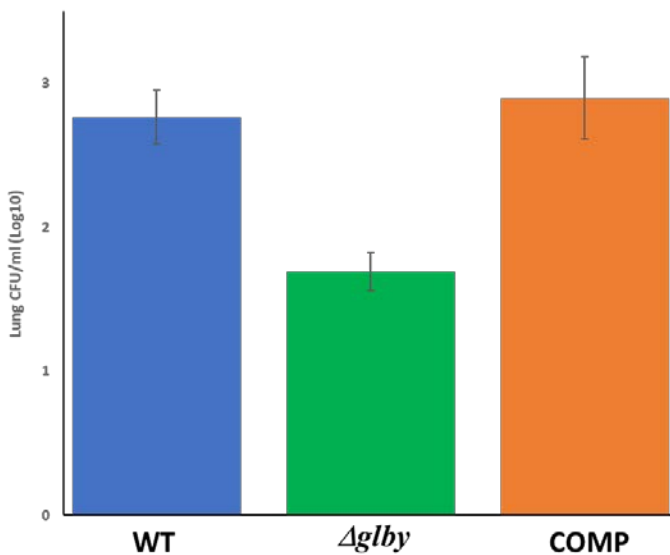

**Figure S11. Pilot Study for implantation rate of strains in the lungs of mice.** All mice were infected with aerosol of suspensions at OD ( $A_{600nm}=0.1$ ) prepared from cultures of ATCC 19977 (WT),  $\Delta glby$  and complemented (COMP) strains at logarithmic phase of growth. Middlebrook 7H11 agar plates were inoculated with lung homogenates collected 24 hours after implantation and enumerated at 1 week of incubation at 37 °C.
